# Supplementary material for: DNA Methylation Profiling Revealed Promoter Hypermethylation-induced Silencing of p16, DDAH2 and DUSP1 in Primary Oral Squamous Cell Carcinoma
Source: PubMed Central journal article supplement — Int J Med Sci. 2013 Oct 12;10(12):1727–39. doi: 10.7150/ijms.6884 (PMC3805925; doi:10.7150/ijms.6884), 2013-10-12
Supplement: ijmsv10p1727s1.pdf [file ijmsv10p1727s1.pdf]

Supplementary table: Gene list of promoter-associated hypermethylated genes of OSCC generated by Illumina's Genome Studio software analysis (p 0.000).<

| UCSC_REFGENE_NAME | UCSC_REFGENE_ACCESSION                     | UCSC_CPG_ISLANDS_NAME     |
|-------------------|--------------------------------------------|---------------------------|
| DFFB              | NM_014704;NM_004402                        | chr1:3775077-3775369      |
| DUSP1             | NM_004417                                  | chr5:172197482-172199606  |
| FEZ2              | NM_001042548;NM_005102                     | chr2:36824792-36825305    |
| RWDD3             | NM_001128142;NM_015485                     | chr1:95699725-95700142    |
| ZNF589            | NM_016089                                  | chr3:48282425-48282817    |
| DDAH2             | NM_013974                                  | chr6:31695894-31698245    |
| TSC22D3           | NM_004089;NM_198057;NM_001015881           | chrX:106959378-106959914  |
| LEPRE1            | NM_022356;NM_001146289                     | chr1:43232214-43233359    |
| ORMDL3            | NM_139280                                  | chr17:38083226-38084052   |
| HYAL2             | NM_003773;NM_033158                        | chr3:50359839-50360042    |
| MUM1              | NM_032853;NR_024247                        | chr19:1354420-1355350     |
| KIF3C             | NM_002254                                  | chr2:26204554-26205649    |
| EPHX2             | NM_001979                                  | chr8:27348658-27348883    |
| GEMIN7            | NM_001007269;NM_001007270;NM_024707        | chr19:45594397-45595007   |
| MIER2             | NM_017550                                  | chr19:345260-345590       |
| MAPRE2            | NM_001143826                               | chr18:32556654-32557883   |
| C14orf80          | NM_001134877                               | chr14:105956175-105958197 |
| VEZF1             | NM_007146                                  | chr17:56064830-56066051   |
| ZBTB4             | NM_001128833;NM_020899                     | chr17:7382266-7382710     |
| P16               | NM_001195132;NM_058195                     | chr9:21967751-21994490    |
| HYAL2             | NM_003773;NM_033158                        | chr3:50359839-50360042    |
| PPT2              | NM_005155;NM_030651;NM_138717              | chr6:32121829-32122529    |
| TRIM65            | NM_173547                                  | chr17:73892496-73893448   |
| TMEM120A          | NM_031925                                  | chr7:75623357-75624164    |
| PFDN5             | NM_002624;NM_145897                        | chr12:53689227-53689570   |
| CCNJ              | NM_001134376;NM_001134375;NM_019084        | chr10:97802871-97804262   |
| GEMIN7            | NM_001007269;NM_001007270;NM_024707        | chr19:45594397-45595007   |
| NCKAP5L           | NM_001037806;NR_027499;NR_027500;NR_027501 | chr12:50221558-50222609   |
| TAF4              | NM_003185                                  | chr20:60638612-60638982   |
| C1orf52           | NM_198077;NR_024113                        | chr1:85724701-85725524    |
| TRAPPC5           | NM_001042461;NM_174894;NM_001042462        | chr19:7745490-7747714     |
| TAF4              | NM_003185                                  | chr20:60639272-60639835   |
| TRIM65            | NM_173547                                  | chr17:73892496-73893448   |
